# Supplementary material for: Inhibition of cell–cell adhesion impairs directional epithelial migration on micropatterned surfaces
Source: Royal Society of Chemistry journal article supplement (doi:10.1039/c5ib00073d), 2015-04-20
Supplement: c5ib00073d1.pdf [file c5ib00073d1.pdf]

## Supplementary Information

### **Inhibition of Cell-Cell Adhesion Randomized Epithelial Chiral Morphogenesis on Micropatterned surfaces**

Kathryn E. Worley<sup>1</sup>, David Shieh<sup>2</sup>, Leo Q. Wan<sup>1,3,4\*</sup>

1 Department of Biomedical Engineering

2 Department of Biology

3 Center for Biotechnology & Interdisciplinary Studies

4 Center for Modeling, Simulation and Imaging in Medicine

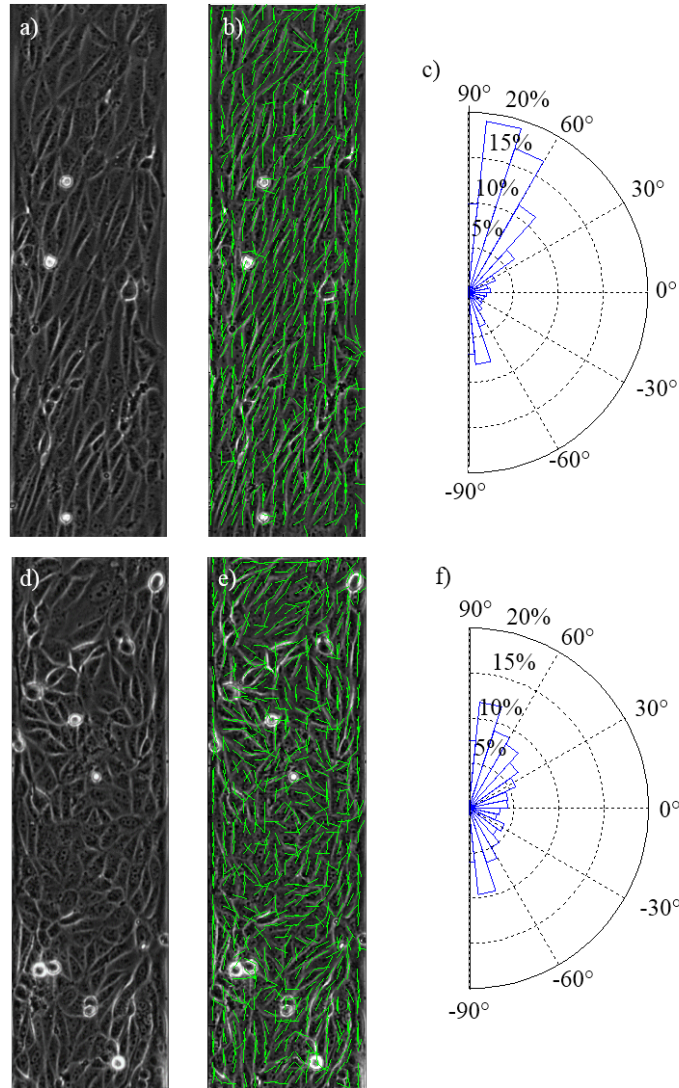

**Supplementary Figure 1.** Intensity gradient analysis of cell alignment indicates biased alignment for the 200  $\mu\text{m}$  control line. A) Phase contrast image of 200  $\mu\text{m}$  control line B) Result of alignment analysis C) An angular histogram displaying the bias in cell alignment for the control line. D) Phase contrast image of 200  $\mu\text{m}$ , 1.0 mM EGTA treated line E) Results of alignment analysis F) An angular histogram displaying a randomization of cell alignment.

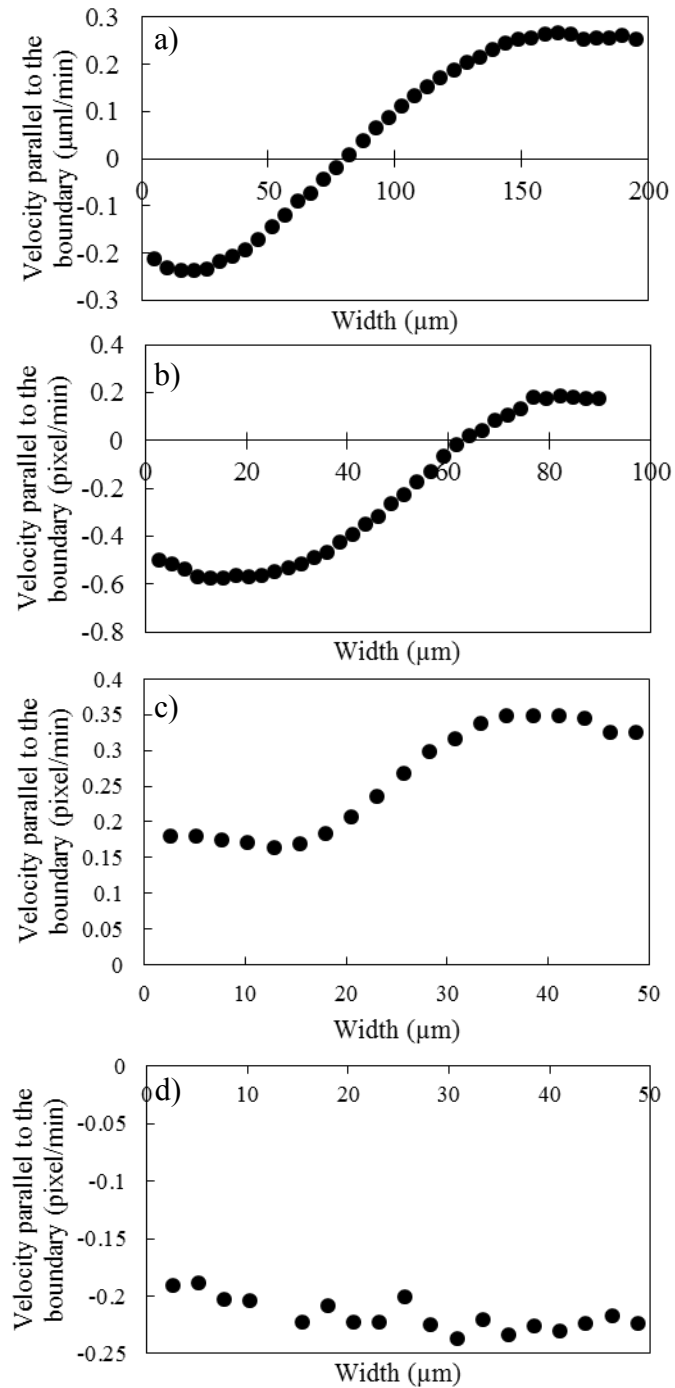

**Supplementary Figure 2.** Velocity profiles of MDCK control micropatterned lines. a) velocity profile of a 200  $\mu\text{m}$  line b) velocity profile of a 100  $\mu\text{m}$  line c) velocity profile of a 50  $\mu\text{m}$  line displaying a distinct linearly varying region d) velocity profile of a 50  $\mu\text{m}$  line displaying no linear region

**Supplementary Movie 1.** Manual cell tracking illustrates the clustered migration of cells at the boundaries of a 200  $\mu\text{m}$  control line with cells located more centrally exhibiting little migration.

**Supplementary Movie 2.** Manual tracking of MDCK cells on a 200  $\mu\text{m}$  line under the treatment of 1 mM EGTA shows more random migration, with cells at the boundaries migrating parallel to the boundary for a period of time, but then moving perpendicularly toward the center of the line. There is also less clustered migration at the pattern boundary.

**Supplementary Movie 3.** Representative movie of cell migration on a 100  $\mu\text{m}$  control line. The cells align similarly to the 200  $\mu\text{m}$  control line, with opposite migration occurring on opposing boundaries.

**Supplementary Movie 4.** Representative movie of cell migration on a 50  $\mu\text{m}$  control line. The cells tend to migrate in the same direction.
